# Supplementary material
Source: publisher figshare collection journal article supplement (https://acs.figshare.com/ndownloader/files/24363726)
Supplement: Supplementary file 1 [file 24363726]

## **Synthesis of semiconducting 2H phase WTe<sub>2</sub> nanosheets with large positive magnetoresistance**

Shuang Li<sup>†,\*,#</sup>, Feng-cai Lei<sup>‡,#</sup>, Xu Peng<sup>§</sup>, Ruo-qi Wang<sup>†</sup>, Jun-feng Xie<sup>‡</sup>, Ya-pan Wu<sup>†</sup> and Dong-sheng Li<sup>†,\*</sup>

<sup>†</sup>College of Materials and Chemical Engineering, Key Laboratory of Inorganic Nonmetallic Crystalline and Energy Conversion Materials, China Three Gorges University, Yichang, 443002, P. R. China

<sup>‡</sup>College of Chemistry, Chemical Engineering and Materials Science, Shandong Normal University, Jinan, 250014, P. R. China.

<sup>§</sup>College of Chemistry and Chemical Engineering, Hubei University, Wuhan, 430062, P. R. China.

\*E-mail: lishmail@126.com

\*E-mail: lidongshengl@126.com.

### **S1. Experimental section**

#### **Materials**

Tungsten powder and tellurium powder were commercially available from Aladdin Chemical Co. Ltd. N-butyl-lithium (n-BuLi) (2.5 M in hexane) was purchased from Sinopharm Chemical Reagent Co. Ltd and used without further purification.

#### **Preparation of bulk WTe<sub>2</sub> powder**

Bulk WTe<sub>2</sub> powder was synthesized by a high-temperature solid reaction. In detail, 1 mmol W powder and 2 mmol Te powder were ground to mix homogeneously and then sealed in an evacuated quartz tube. The tube was heated in a horizontal tube furnace at 900 °C for 12 h with a heating rate of about 3 °C/min. The system was then allowed to cool to room temperature with a cooling rate of about 5 °C/min. The product was directly collected from the quartz tube without washing.

### **Preparation of precursor $\text{Li}_x\text{WTe}_2$**

$\text{Li}_x\text{WTe}_2$  precursor was synthesized through a lithium intercalation process. Typically, the 40 mg of  $\text{WTe}_2$  powder was dispersed in 4 mL of hexane with 1.0 mL of n-BuLi in a customized glass vacuum system. The reaction system was stirred and kept at 60°C for 12 h. The obtained dispersion was filtered, washed with cyclohexane and anhydrous ethanol for several times, and dried at 60°C for 30 min under vacuum.

### **Exfoliation of $\text{Li}_x\text{WTe}_2$ into $\text{WTe}_2$ ultrathin nanosheets**

In a typically procedure, 20 mg of the as-obtained  $\text{Li}_x\text{WTe}_2$  precursor and 20 mL of formamide (FA)/ethanol mixture ( $V_{\text{FA}}/V_{\text{EtOH}} = 9:1$ ) were loaded in a weighing bottle with a total capacity of 20 mL. Then the solution was bubbled with nitrogen to eliminate the dissolved oxygen molecules for avoiding oxidation. The above dispersion was ultra-sonicated in ice water for 4 h. Here, the ice water was used to keep the system in a relatively low temperature. Afterward, the resultant suspension was centrifuged at 2000 rpm for 3 min to remove the residual un-exfoliated particles, and the supernatant was finally collected by high-speed centrifugation and washed by ethanol for further characterizations.

### **Characterizations**

X-ray diffraction (XRD) was performed on a Philips X'Pert ProSuper diffractometer with Cu  $K\alpha$  radiation ( $\lambda = 1.54178 \text{ \AA}$ ). The field emission scanning electron microscopy (FE-SEM) images were taken on a JEOL JSM-6700F SEM. The transmission electron microscopy (TEM) image was carried out on a JEM-2100F field emission electron microscope at an acceleration voltage of 200 kV. High-angle annular dark-field scanning transmission spectroscopy (HAADF-STEM) image and corresponding energy-dispersive spectroscopy mapping analyses were performed on a JEOL JEM-ARF 200F TEM/STEM with a spherical aberration corrector. Raman spectra were recorded on a Renishaw RM3000 Micro-Raman system with a 514.5 nm Ar laser. X-ray photoelectron spectra (XPS) was acquired on an ESCALAB MK II with Mg  $K\alpha$  as the excitation source. The electrical transport property measurements were carried out using a Keithley 4200-SCS Semiconductor Characterization System and a four-point probe method. Magnetoresistance was measured by a four-point

technique using a Quantum Design Physical Property Measurement System (PPMS)-9 using the van der Pauw method. Electrochemical station (CHI 660B) was used for the photodetector measurement. The photodetector based on WTe<sub>2</sub> nanosheets was fabricated by depositing the WTe<sub>2</sub> nanosheets on the gap between the ITO electrode.<sup>1</sup>

### **DFT calculation details**

The electronic structure calculations have been performed by the VASP package (PAW).<sup>2-4</sup> To achieve the accurate density of the electronic states, the plane wave cutoff energy was 500 eV, a 7×7×5 for bulk Td WTe<sub>2</sub> and 11×11×1 for 2H WTe<sub>2</sub> nanosheet k-point mesh were used. Ionic relaxations were carried out under the conventional energy (10<sup>-4</sup> eV) and force (0.02 eV/Å) convergence criteria. Of note, from the HRTEM data (d<sub>100</sub>=0.307 nm) and XRD, we calculated the unit cell parameters of the 2H nanosheet are a=b=0.355 nm, c=1.4 nm, while the unit cell parameters of the Td bulk are a=0.347 nm, b=0.625 nm, c=1.4 nm.

### **S2. Additional characterization information**

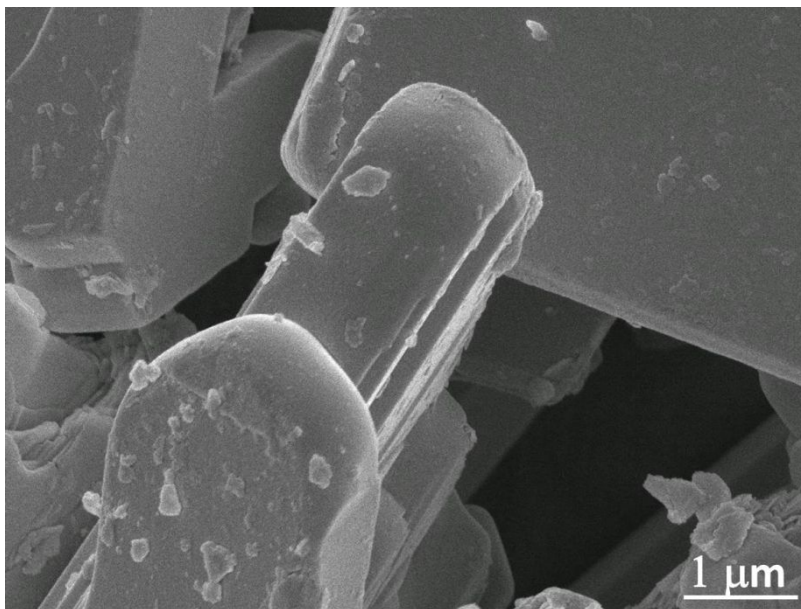

**Figure S1.** SEM image of the bulk Td WTe<sub>2</sub>.

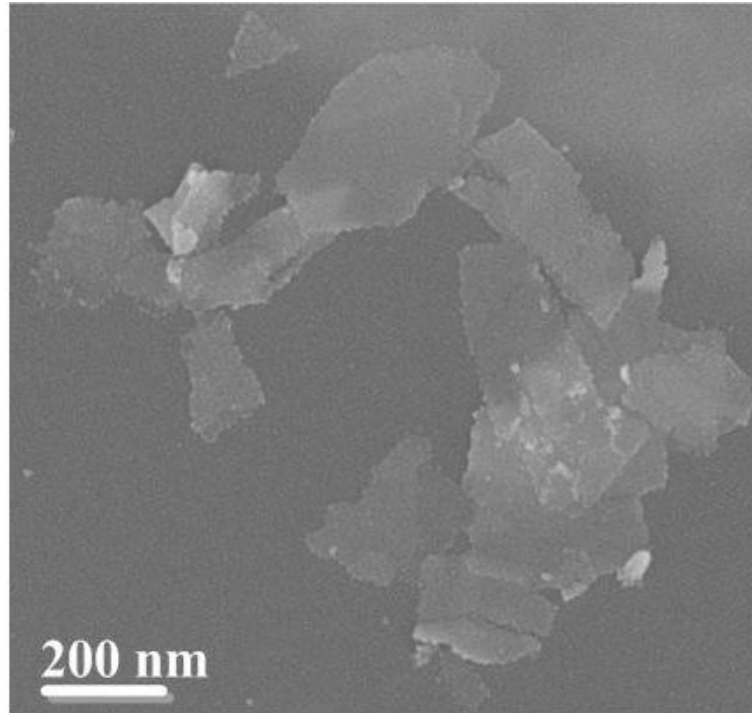

**Figure S2.** SEM image of the 2H WTe<sub>2</sub> ultrathin nanosheets.

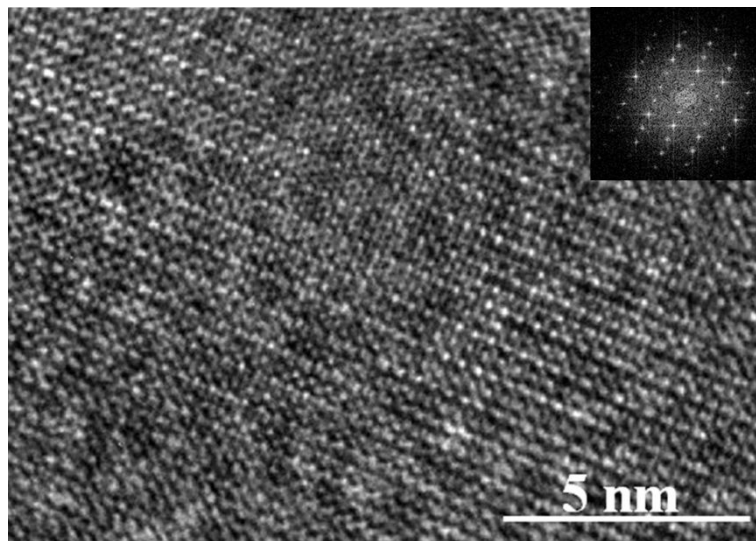

**Figure S3.** The HRTEM and corresponding FFT images of bulk WTe<sub>2</sub> with the typically orthorhombic phase.

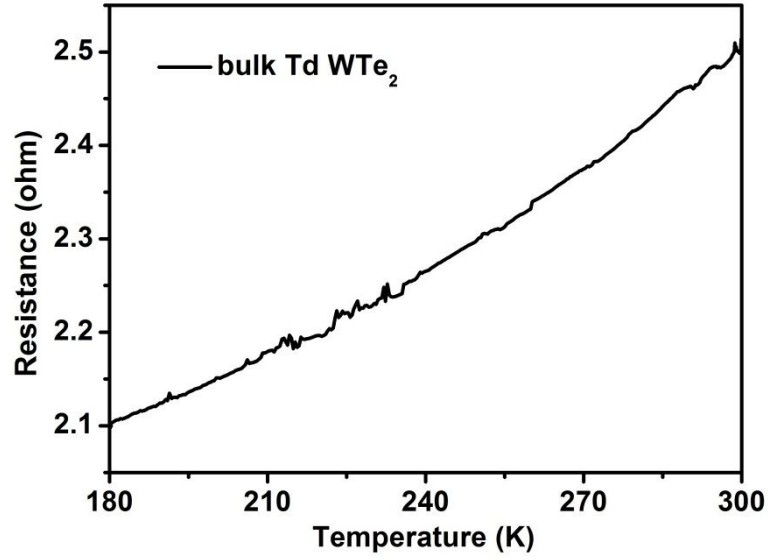

**Figure S4.** Temperature-dependent resistance of bulk Td WTe<sub>2</sub>.

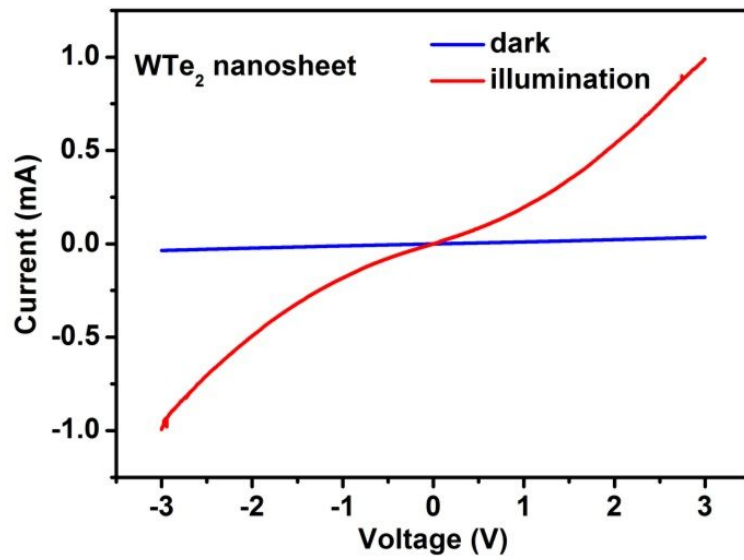

**Figure S5.** Photocurrent versus voltage plots of the as-exfoliated WTe<sub>2</sub> ultrathin nanosheet in the dark and under light illumination.

## References

1. X. Hu, X. Zhang, L. Liang, J. Bao, S. Li, W. Yang, and Y. Xie, *Adv. Funct. Mater.*, 2014, **24**, 7373.
2. J. J. Mortensen, L. B. Hansen, and K. W. Jacobsen, *Phys. Rev. B.*, 1994, **50**, 17953.
3. G. Kresse, J. Furthmuller, *Phys. Rev. B.*, 1996, **54**, 11169
4. W. Kohn, L. J. Sham, *Phys. Rev.* 1965, **140**, A1133.
